1 The role of a structured community health worker  
2 network in achieving malaria elimination goals in the  
3 Dominican Republic: an impact evaluation amid COVID-19  
4 Disruptions

5  
6  
7 Nicole Michelén Ströfer<sup>1</sup>, Natalia Tejada Bueno<sup>1</sup>, María Yinet Santos Félix<sup>2</sup>, Jose Luis Cruz  
8 Raposo<sup>2</sup>, Justin T. Lana<sup>1</sup>, Valérian Turbé<sup>1</sup>, Justin M. Cohen<sup>1</sup> and Harriet Napier<sup>1</sup>

9  
10 <sup>1</sup> Clinton Health Access Initiative, Boston, Massachusetts, United States

11 <sup>2</sup> Ministerio de Salud Pública y Asistencia Social, Santo Domingo, Dominican Republic,

12  
13  
14  
15 \*Corresponding Author

16 [michelenstrofernicole@gmail.com](mailto:michelenstrofernicole@gmail.com) (NMS)

17  
18  
19  
20  
21  
22

## 23 Abstract:

24 Community health workers (CHWs) can play a key role in malaria elimination through expanding  
25 access to malaria testing and treatment. The Dominican Republic, a low endemic country  
26 committed to eliminate malaria by 2025, implemented a structured malaria CHW network in the  
27 three main urban foci of Greater Santo Domingo. This research quantifies the networks'  
28 contributions towards malaria elimination from its implementation in 2019 until 2022. The study  
29 highlights the impact of COVID-19 disruptions on CHWs' performance and explores the network's  
30 ability to bounce back from health systems' shocks.

31 The performance of a malaria CHW network in Greater Santo Domingo, Dominican Republic was  
32 evaluated using weekly data collected from CHWs and routinely collected surveillance data from  
33 the Ministry of Public Health (MoH). We assess performance of CHWs by analyzing key variables  
34 such as (1) reporting compliance, (2) household visitation rates, (3) malaria rapid diagnostic tests  
35 performed, (4) malaria cases detected, and (5) time between symptom onset and malaria  
36 diagnosis. To evaluate the impact of COVID-19 on the network, CHW's performance indicators  
37 are evaluated across three time periods (prior to, during, and after COVID-19 interruptions).

38 Results showed that over the evaluation period, reported malaria cases in study foci decreased  
39 from 1,243 cases in 2019 to 5 cases in 2023. CHWs diagnosed and treated over 43% of malaria  
40 cases in study foci before COVID-19 interruptions and 14% during interruptions. 83% of cases  
41 detected by CHWs were detected through active case detection, with 17% detected passively.  
42 CHWs detected malaria cases and initiated treatment 1.5 days earlier than health facilities and  
43 MoH personnel performing active case detection.

44 This evaluation provides evidence that a structured CHW network with clearly defined  
45 responsibilities and management protocol can assume a large proportion of malaria case  
46 management service provision, contribute to early malaria case detection, and help curb local  
47 malaria transmission. It adds to a growing body of research on the feasibility and benefits of CHW-

48 led proactive household visitation. Despite interruptions such as the COVID-19 pandemic,  
49 concerted investment can sustain CHW program gains.

## 50 Introduction:

51 CHWs play a key role in the global fight against malaria, primarily through expanding access to  
52 malaria testing and treatment in communities underserved or poorly reached by national health  
53 systems. In 2019, the Dominican Republic (DR), one of two malaria endemic Caribbean nations,  
54 signed the Regional Malaria Elimination Initiative (RMEI) pledge, demonstrating its commitment  
55 to eliminate malaria by 2020 (a date that was later postponed to 2025) [1]. The National Malaria  
56 Program (NMP) built its elimination programming around the Panamerican Health Organization/  
57 World Health Organization (PAHO/WHO) recommended strategy: Diagnostics, Treatment,  
58 Investigation, and Response (DTI-R) [2]. This strategy emphasizes that malaria infected individuals  
59 should access diagnosis and treatment within the shortest possible time [2].

60 In line with the DTI-R strategy and the country's commitment to eliminating malaria, the NMP set  
61 up a CHW network to increase access to timely treatment and diagnosis in high-risk communities.  
62 Community integration for malaria elimination had been considered for decades, predating the  
63 establishment of CHWs networks in the country; however, these strategies primarily relied on  
64 individual volunteers instead of a formally paid and structured network [3].

65 In 2019, the country implemented a structured and paid (CHW) network in the three key foci of  
66 Greater Santo Domingo that reported 96% (1,243/1,292) of all national indigenous cases at the  
67 time: Los Tres Brazos, La Cienaga and San Cristobal. The complete criteria and procedures for the  
68 design, implementation, and management of the CHW network are detailed in the National CHW  
69 Network Implementation and Management Guidelines [4].

70 Since CHW's implementation in 2019, urban malaria has nearly been eliminated and reported  
71 cases have increased in more rural provinces, such as San Juan (Fig 1). This research seeks to

72 document the association between a structured CHW network and progress toward malaria  
73 elimination in the Dominican Republic. It quantifies the impact of COVID-19 disruptions on CHWs'  
74 performance and explores the ability of a well-supported CHW network to bounce back after  
75 routine operations have recommenced.

76 **Fig 1: Distribution of malaria cases in Dominican Republic's high transmission foci for the years**  
77 **2019 – 2022.** The high transmission foci of Greater Santo Domingo and San Juan are highlighted.  
78 Data source: Centro de Prevención y Control de Enfermedades Transmitidas por Vectores y  
79 Zoonosis (CECOVEZ) national malaria risk stratification database [5].

## 80 **Methods:**

81 This study analyzed data from CHW implementation in La Cienaga (June 2019), San Cristobal (June  
82 2019), and Los Tres Brazos (December 2019) until December 2022, including a period of COVID-  
83 19 related interruptions. Performance of the CHW network was examined across three time  
84 periods (Fig 2): (1) pre-COVID-19 interruption (through April 2020), (2) during COVID-19  
85 interruptions (March 2020 until July 2021) and (3) post-COVID-19 interruptions (August 2021 to  
86 December 2022). The COVID-19 interruption period included three subphases: (i) COVID-19  
87 lockdown, which was the time where CHWs activities were completely paused due to national  
88 lockdown (March 2020-September 2020), (ii) COVID-19 restrictions, which was the time period  
89 where CHWs activities were limited to house visits 2 or 3 days a week depending on availability  
90 of personal protective equipment (Sept 2020-February 2021), and (iii) administrative delays that  
91 led to CHWs activities temporary suspension due to delays in the contract renewal process  
92 (February 2021 – July 2021).

93 Two primary data sources were used. SurveyCTO, an online platform implemented to ensure  
94 CHWs monitoring and evaluation (M&E) [6], provided data on CHW performance, including  
95 number of houses visited per day, persons contacted, tests performed, and cases detected [7-  
96 10]. Weekly CHW performance evaluations began at the onset of implementing the network and

97 have been ongoing since, resulting in 4,989 CHW M&E forms collected in the SurveyCTO  
98 database. The MoH collects malaria data using an internal database updated on a weekly basis by  
99 their epidemiology team. The MoH malaria database was used to review data on overall  
100 epidemiological trends and case management practices at other levels of the health system [11].  
101 Results are presented across four categories: (iv) household visitation; (v) malaria testing; (vi)  
102 malaria case detection; and (vii) time between symptom onset and treatment. Whenever it was  
103 possible, data were assessed during each of the three time periods. Using Stata version 14.2,  
104 paired t-tests were used to compare average monthly household visits, rapid diagnostic tests  
105 (RDTs) performed, and test positivity for those CHWs who were active in both periods of  
106 comparison (i.e., pre-during, during-posts, pre-post).

## 107 **Results:**

### 108 **CHW household visitation, testing and case detection**

109 On average, during the pre-interruption phase, each CHW visited 130 houses per week. During  
110 the interruption phase, that number decreased to 80 houses per week before increasing to 185  
111 houses per week in the post interruption phase (Fig 2).

112 Paired t-tests comparing mean weekly household visits for CHWs working pre-and-during  
113 interruption periods ( $t= 16.29$ ;  $df = 58$ ;  $p < 0.001$ ), during and post interruption ( $t = -15.76$ ,  $df =$   
114  $46$ ;  $p < 0.001$ ), were found to be significantly different. During the pre-interruption time period,  
115 on average, CHWs complied with their target visitation (table 1) by 98%. During the interruptions  
116 time period, CHWs performed 48% of the target household visitations. During the post  
117 interruption period, CHWs complied with 93% of their expected household visitation.

118 Table 1 shows the total number of household visitations per focus during the different time  
119 periods, highlighting the different visitation targets per focus and number of active CHWs.

120

121 Table 1. CHWs House Visits.

| Foci            | Pre-Interruption<br>LC/SC: June 2019 - March 2020<br>LTB: December 2019 - March 2020 |                                               |                                      | During Interruptions<br>March 2020 - July 2021 |                                               |                                      | Post Interruptions<br>July 2021 - December 2022 |                                               |                                      |
|-----------------|--------------------------------------------------------------------------------------|-----------------------------------------------|--------------------------------------|------------------------------------------------|-----------------------------------------------|--------------------------------------|-------------------------------------------------|-----------------------------------------------|--------------------------------------|
|                 | # CHWs                                                                               | Average weekly house visits performed per CHW | Weekly house visits expected per CHW | # CHWs                                         | Average weekly house visits performed per CHW | Weekly house visits expected per CHW | # CHWs                                          | Average weekly house visits performed per CHW | Weekly house visits expected per CHW |
| Los Tres Brazos | 44                                                                                   | 158                                           | 200                                  | 49                                             | 87                                            | 200                                  | 32                                              | 186                                           | 200                                  |
| La Cienaga      | 20                                                                                   | 111                                           | 100                                  | 14                                             | 54                                            | 100                                  | 11                                              | 187                                           | 200                                  |
| San Cristobal   | 6                                                                                    | 113                                           | 100                                  | 6                                              | 80                                            | 100                                  | 4                                               | 181                                           | 200                                  |

122 Data sources: SurveyCTO Weekly La Cienaga and San Cristobal Monitoring and Evaluation

123 Database, SurveyCTO Weekly Los Tres Brazos Monitoring and Evaluation Database [6-8].

124 On average, in all foci, during the pre-interruption time period, each CHW performed 7 RDTs per

125 week. During interruptions, each contracted CHW performed an average of 2 RDTs per week.

126 Post interruptions, CHWs performed an average of 3 RDTs per week (graph 1). Paired t-tests

127 comparing mean weekly RDTs performed by CHWs found significantly fewer RDTs performed

128 during interruptions (2.0) compared to the same CHW working pre interruption (7.8) ( $t = 12.52$ ;

129 df = 58;  $p < 0.001$ ). For CHW working pre and post interruption ( $t = 9.35$ ;  $df = 42$ ;  $p = 0.0417$ ) the  
130 number of RDTs dropped significantly from 8.3 to 3.1, respectively. The difference in mean  
131 monthly RDTs by CHWs increased significantly from 2.1 in the interruption compared to 3.1 post  
132 interruption ( $t = -4.73$ ;  $df = 46$ ;  $p < 0.001$ ).

133 From 2019 to 2022 (over all three time periods combined), CHWs in all foci detected 36%  
134 (467/1,311) of cases, while other points of care (health facilities and local MoH personnel who  
135 perform active and passive case detection in their corresponding sectors) detected 64%  
136 (844/1,311). In the pre-interruptions time period CHWs detected 43% of cases (419/973), during  
137 interruptions this percentage decreased to 14% (45/321), and post interruptions increased to  
138 18% (3/17) (Fig 2).

139 **Fig 2. Key CHWs' performance indicators by focus and time period.** Barchart representing the  
140 number of house visits and tests conducted weekly by CHWs in each of the 3 foci since the  
141 implementation of the CHW network<sup>9,10,11,17</sup>. The bars (and line) plots represent, the total number  
142 (and corresponding percentage) of cases detected by CHWs compared to other cases detected  
143 by other entities (local MoH personnel who perform active case detection, and health facilities),  
144 by quarter, since the implementation of the CHW network until 2022. Background colors denote  
145 significant periods of time during which the performance of the network was affected. Bottom  
146 labels indicate the start of the CHW network implementation, for each focus. Data sources:  
147 SurveyCTO Weekly La Cienaga and San Cristobal Monitoring and Evaluation Database, SurveyCTO  
148 Weekly Los Tres Brazos Monitoring and Evaluation Database [6-11].

## 149 Test positivity comparison

150 On average, across all foci, during the pre-interruption phase, CHW test positivity rate was 4%.  
151 During interruptions, test positivity rate decreased to 2% and post interruptions it continued to  
152 decrease to 0.04% The difference in mean monthly TPR for CHWs working pre and during  
153 interruption were not significantly different ( $t = 1.843$ ;  $df = 55$ ;  $p = 0.0707$ ) using a threshold of

154 0.05, , unlike the mean monthly TPR during v post ( $t = 3.72$ ;  $df = 43$ ,  $p = 0.006$ ) which was  
 155 significant.

156 **Comparison of active vs. passive CHWs case detection**

157 83% (389/467) of cases detected by CHWs were detected through active case detection (CHWs  
 158 household visitations). The remaining 17% (78/467) percent of cases detected by CHWs were  
 159 detected passively through symptomatic patients electing to seek out CHWs for malaria testing  
 160 (table 2).

161 **Table 2. CHW confirmed cases by detection type and test positivity rate (TPR)**

| # CHWs                                        | Rapid Diagnosed Tests (RDTs) performed by CHW | Total Cases detected by CHW | Active case detection by CHW (% total) | Passive case detection by CHW (% total) | Test Positivity Rate (TPR) |
|-----------------------------------------------|-----------------------------------------------|-----------------------------|----------------------------------------|-----------------------------------------|----------------------------|
| Pre-Interruption: June 2019 - March 2020      |                                               |                             |                                        |                                         |                            |
| 70                                            | 9932                                          | 419                         | 346 (83%)                              | 73 (17%)                                | 4%                         |
| During Interruptions: March 2020 - July 2021  |                                               |                             |                                        |                                         |                            |
| 63                                            | 2487                                          | 45                          | 40 (89%)                               | 5 (11%)                                 | 2%                         |
| Post Interruptions: July 2021 - December 2022 |                                               |                             |                                        |                                         |                            |
| 47                                            | 8560                                          | 3                           | 3 (100%)                               | 0                                       | 0.04%                      |

162 Data sources: SurveyCTO Weekly La Cienaga and San Cristobal Monitoring and Evaluation  
 163 Database, SurveyCTO Weekly Los Tres Brazos Monitoring and Evaluation Database [6-8].



## 164 Time between symptom onset and diagnoses

165 Of cases detected by CHWs, 28% were detected within WHO's recommended timeframe of 48  
166 hours within symptom onset [6], compared to only 13.5% of cases diagnosed by other entities  
167 (health facilities and local level MoH). In the pre interruption period, 88/301 cases diagnosed by  
168 CHWs were diagnosed within the WHO recommended timeframe. During the interruption phase,  
169 7 out of 34 cases were diagnosed within 2 days or less of symptom onset (21%), and post  
170 interruption only 1 out of 6 cases (17%) were detected within this time frame.

171 The median time between symptom onset and diagnosis for CHWs was 4 days during the pre-  
172 interruption period, compared to 5 days for other entities during the same period. During the  
173 interruptions period, the median time for both was 5 days. While very few cases were captured  
174 post interruption; the median time between symptom onset and diagnoses for those found by  
175 CHWs was 6.5 days compared to 7 days for other entities (Fig 3).

176 **Fig 3. Time between symptom onset and diagnosis.** Histogram charts illustrate the days between  
177 symptom onset and diagnosis (y axis) for cases diagnosed by CHW or other entity (counts on X  
178 axis). The dotted line represents the median value by provider type and period. \*One outlier of  
179 122 removed for Other for visualization purposes only. Data sources: SurveyCTO Weekly La  
180 Cienaga and San Cristobal Monitoring and Evaluation Database, SurveyCTO Weekly Los Tres  
181 Brazos Monitoring and Evaluation Database [6-11].

182 It is important to note that CHWs detected 467 cases during the study period, according to the  
183 SurveyCTO database used to manage CHWs' activities. However, only 341 of these cases could  
184 be matched in the CECOVEZ database. Therefore, 126 cases detected by CHWs were included  
185 with those identified by other entities, as we were unable to specifically identify those as being  
186 detected by CHWs. In the pre-interruption time period, 103 cases were not matched between  
187 both data bases, in the during interruption time period 21 cases were not matched, and in the  
188 post-interruption period 2 cases were not matched.

## 189 Timeliness of CHWs treatment administration over time

190 WHO recommends that all patients are treated within 24 hours [2]. 96% of the cases detected by  
191 CHWs were treated within the first 24 hours. Pre-interruptions, Pre-interruptions, CHWs treated  
192 392/409 cases within the first 24 hours, during interruption CHWs treated 53/55 cases in this  
193 time frame and post interruptions all (3/3) cases detected by CHWs were detected within this  
194 time frame. Time between diagnoses and treatment is not available for cases detected by other  
195 entities; hence, it is not possible to compare these data.

## 196 Discussion

197 A structured CHW network of over 80 CHWs contributed to malaria case reductions in three  
198 urban foci of the DR by detecting a high proportion of all malaria cases (over 44% when working  
199 without interruptions) while reducing the time between symptom onset and diagnoses compared  
200 to other malaria care providers. Results align with other CHW implementation research findings  
201 and with WHO guidelines, which emphasize the importance of a structured community-based  
202 recruitment process and integration of CHWs within existing primary healthcare systems [12-15].  
203 This investigation provides the first documentation in Central America and the Caribbean of the  
204 impact of COVID-19 on performance of an established malaria CHW network. COVID-19  
205 interruptions are observed across a number of axes, including CHW's household visitation, testing  
206 rate, case detection and timeliness of case management services. The impact of COVID-19  
207 interruptions was observed as decreases in CHWs: (I) average number of weekly household visits  
208 (46% decrease), (II) average number of weekly RDTs performed by each CHW (from 7 to 2), (III)  
209 number of cases detected by the CHW network (89% decrease) and (VI) compliance with WHO's  
210 recommended timeframe for time between symptom onset and case detection (from 29%  
211 compliance to 21% compliance). Despite these secondary effects observed during COVID-19  
212 interruptions, our study indicates that a well-structured and well-compensated CHW program  
213 can bounce back quickly from such shocks as demonstrated by rapid rebounds in retention,

214 reporting levels and the number of households visited in the post-interruption time period [12-  
215 15].

216 Proactive malaria case detection has shown promising outcomes, including heightened case  
217 detection rates, and expanded treatment opportunities in numerous countries [3, 16-19], but its  
218 application has been minimal in large-scale CHW programs in Latin America. Our work  
219 demonstrates that there is high potential for proactive household visitation by CHWs, when such  
220 daily work is integrated into their responsibilities from program inception and pay is reflected of  
221 the work they are contracted to do. Over the course of this study, 83% of CHW-detected malaria  
222 cases were detected through proactive household visitation. The ability of CHWs to reduce the  
223 time between symptom onset and diagnosis, especially pre-interruptions (both passively and  
224 proactively), may help cut transmission and catalyze malaria elimination. However, over 75% of  
225 the total number cases detected by both CHWs and other service providers were detected after  
226 24 hours of symptom onset. This delay may be attributed to various factors, including inadequate  
227 access to healthcare services and CHWs. Moreover, it underscores a potential need for behavioral  
228 change within the population, as individuals might not be actively seeking timely diagnosis.

229 In addition to yielding malaria-specific benefits, high rates of routine encounters between CHWs  
230 and households provide a strong foundation for expanding into other areas of health work, which  
231 may in turn increase demand for malaria testing and treatment services as burden continues to  
232 decline [16]. Over the course of the three time periods, malaria RDTs were performed in fewer  
233 than 5% of CHW household visits. If 95% of household visits conducted by CHWs do not include  
234 an RDT, much could be gained from a health system and community trust perspective by  
235 equipping the CHWs with complementary skills and services such as TB, maternal and child  
236 health, vaccinations, and health promotion. Previous studies have emphasized how integrating  
237 different tasks to vertical CHW program can increase care seeking and confirmatory malaria  
238 testing rates [3-20]. If CHWs are fairly paid, and their catchment populations carefully and

239 reasonably calculated and locally validated, integrating household visitation into their routine  
240 work is sensible and should come without an extra cost [21].

241 Our evaluation has limitations. Lack of data from other service providers prevented more  
242 comparisons between service provider type (health posts vs CHWs). More generally, CHWs were  
243 selected to work the in the most endemic areas of the urban foci, thereby rendering it impossible  
244 to have comparable sites with no CHWs to make stronger inference on their effect in reducing  
245 cases and/or the effect of COVID-19 lockdowns on transmission. It is unclear to what effect stigma  
246 or fear related to reporting a fever during the COVID-19 pandemic might have affected our  
247 findings. Our results are based on a relatively small, paid, malaria-only CHW cadre which may  
248 decrease our study's generalizability to other large-scale volunteer CHW networks in more  
249 endemic settings or that rely on volunteer workers. This study does not include an economic  
250 evaluation which precludes us from quantifying the cost per case averted from a paid CHW  
251 network.

## 252 Conclusion

253 This study adds to the existing research that a well-organized CHW network, with defined roles  
254 and management protocols, holds the potential to undertake a significant portion of malaria case  
255 management services, increase early malaria case detection, and contribute substantially to  
256 elimination of local malaria transmission. These findings complement an expanding body of  
257 research highlighting the viability and advantages of CHW-led proactive household visits. Despite  
258 disruptions such as the COVID-19 pandemic, a well-structured CHW programs can uphold and  
259 further enhance the gains achieved.

## 260 Acknowledgements

261 We would like to thank the Community Health Workers for their hard work and consistency. The  
262 local and central level health authorities for their dedication and compromise with the

- 263 community, including the following personnel and their teams: Domingo Cabral, Dr. Francisco  
264 Camilo, Dr. Carmen Rosa Then, Dr. Josvane Japa, Dr. Alba Núñez, Dr. Alondra Frías, Dr. Juan David  
265 Domínguez, Dra. Diana Taveras, Dra. Mirna Salomón, Dr. Yeinmy Campusano.

## 266 References

- 267 1. D. B., D. R. Convenio Individual de Financiamiento no Reembolsable de la Facilidad de  
268 Financiamiento Combinado para la Eliminación de la Malaria. [Internet]. 2019 Apr 30  
269 [cited 2023 Oct 9]. Available from: <https://www.iadb.org/en/project/DR-G0002>
- 270 2. Ministerio de Salud Pública. Protocolo de Vigilancia de Malaria. [Internet]. 2020 Jun 10  
271 [cited 2023 Oct 9]. Available from: [https://digepi.gob.do/media/j24b51s4/3-1-1-  
272 protocolo-de-vigilancia-de-malaria.pdf](https://digepi.gob.do/media/j24b51s4/3-1-1-protocolo-de-vigilancia-de-malaria.pdf)
- 273 3. Valdez D, Keys HM, Ureña K, Cabral D, Camilo F, Ogando EC, et al. Malaria outbreak  
274 response in urban Santo Domingo, Dominican Republic: lessons learned for community  
275 engagement. Rev Panam Salud Publica (Impresa). 2020;44:1.  
276 <https://doi.org/10.26633/rpsp.2020.92>
- 277 4. Ministerio de Salud Pública y Asistencia Social. Directrices Operacionales para la  
278 Implementación y Gestión de la Red de Colaboradores Comunitarios para la Eliminación  
279 de la Malaria. [Internet]. 2023 [cited 2023 Oct 9]. Available from:  
280 [https://repositorio.msp.gob.do/bitstream/handle/123456789/2317/9789945644388.pdf  
281 f?sequence=1](https://repositorio.msp.gob.do/bitstream/handle/123456789/2317/9789945644388.pdf?sequence=1)
- 282 5. Centro de Control y Prevención de Enfermedades Transmitidas por Vectores y Zoonosis  
283 (CECOVEZ). CECOVEZ national malaria risk stratification database [Database]. Ministry of  
284 Health; 2023.
- 285 6. Dability, Inc. SurveyCTO Server v2.81.2 [Software]. [Internet]. 2023 [cited 2023 Oct 9].  
286 Available from: <https://www.surveyccto.com/>

- 287 7. Centro de Control y Prevención de Enfermedades Transmitidas por Vectores y Zoonosis  
288 (CECOVEZ). Weekly La Cienaga and San Cristobal Monitoring and Evaluation Database  
289 "Dominicana - Monitoreo & Evaluacion Semanal (dr-monitoreosemanal)" [Data set].  
290 SurveyCTO; 2023.
- 291 8. Centro de Control y Prevención de Enfermedades Transmitidas por Vectores y Zoonosis  
292 (CECOVEZ). Weekly Los Tres Brazos Monitoring and Evaluation Database "Dominicana  
293 Tres Brazos - Monitoreo & Evaluacion Semanal (dr3b-monitoreosemanal)" [Data set].  
294 SurveyCTO; 2023.
- 295 9. Centro de Control y Prevención de Enfermedades Transmitidas por Vectores y Zoonosis  
296 (CECOVEZ). Weekly La Cienaga and San Cristobal Monitoring and Evaluation Confirmed  
297 Case Database "Dominicana - Monitoreo & Evaluacion Semanal – Casos Confirmados (dr-  
298 casosconfirmados)" [Data set]. SurveyCTO; 2023.
- 299 10. Centro de Control y Prevención de Enfermedades Transmitidas por Vectores y Zoonosis  
300 (CECOVEZ). Weekly Los Tres Brazos Monitoring and Evaluation Confirmed Case Database  
301 "Dominicana Tres Brazos - Monitoreo & Evaluacion Semanal (dr3b-casosconfirmados)"  
302 [Data set]. SurveyCTO; 2023.
- 303 11. Centro de Control y Prevención de Enfermedades Transmitidas por Vectores y Zoonosis  
304 (CECOVEZ). Malaria Program Confirmed Case Database (Base de Datos de Casos  
305 Confirmados Programa de Malaria). CECOVEZ; 2023.
- 306 12. Dam TA, Forse RJ, Tran PMT, Vo LNQ, Codlin AJ, Nguyen LP, et al. What makes community  
307 health worker models for tuberculosis active case finding work? A cross-sectional study  
308 of TB REACH projects to identify success factors for increasing case notifications. Hum  
309 Resour Health. 2022;20(1). <https://doi.org/10.1186/s12960-022-00708-1>

- 310 13. Baltzell K, Harvard K, Hanley M, Gosling R, Chen I. What is community engagement and  
311 how can it drive malaria elimination? Case studies and stakeholder interviews. *Malar J.*  
312 2019;18(1). <https://doi.org/10.1186/s12936-019-2878-8>
- 313 14. Guidelines Review Committee. WHO guideline on health policy and system support to  
314 optimize community health worker programmes. [Internet]. 2018 Aug 6 [cited 2023 Oct  
315 9]. Available from: <https://www.who.int/publications/i/item/9789241550369>
- 316 15. John A, Nisbett N, Barnett I, Avula R, Menon P. Factors influencing the performance of  
317 community health workers: A qualitative study of Anganwadi Workers from Bihar, India.  
318 *PLoS One.* 2020;15(11). <https://doi.org/10.1371/journal.pone.0242460>
- 319 16. Gaye S, Kibler J, Ndiaye JL, Diouf ML, Linn A, Guèye AB, et al. Proactive community case  
320 management in Senegal 2014–2016: a case study in maximizing the impact of community  
321 case management of malaria. *Malar J.* 2020;19(1). [https://doi.org/10.1186/s12936-020-](https://doi.org/10.1186/s12936-020-03238-0)  
322 [03238-0](https://doi.org/10.1186/s12936-020-03238-0)
- 323 17. Linn A, Ndiaye Y, Hennessee I, Gaye S, Linn P, Nordström K, et al. Reduction in  
324 symptomatic malaria prevalence through proactive community treatment in rural  
325 Senegal. *Trop Med Int Health.* 2015;20(11):1438–1446.  
326 <https://doi.org/10.1111/tmi.12564>
- 327 18. Johnson A, Thomson DR, Atwood S, Alley I, Beckerman J, Koné I, et al. Assessing Early  
328 Access to Care and Child Survival during a Health System Strengthening Intervention in  
329 Mali: A Repeated Cross Sectional Survey. *PLoS One.* 2013;8(12).  
330 <https://doi.org/10.1371/journal.pone.0081304>



- 331 19. Johnson A, Thiero O, Whidden C, Poudiougou B, Diakité D, Traore F, et al. Proactive  
332 community case management and child survival in periurban Mali. *BMJ Glob Health*.  
333 2018;3(2). <https://doi.org/10.1136/bmigh-2017-000634>
- 334 20. Napier HG, Baird M, Wong E, Walwyn-Jones E, Garcia ME, Cartagena L, et al. Evaluating  
335 Vertical Malaria Community Health Worker Programs as Malaria Declines: Learning from  
336 program evaluations in Honduras and Lao PDR. *Glob Health Sci Pract*. 2021;9(Suppl 1)–  
337 S110. <https://doi.org/10.9745/ghsp-d-20-00379>
- 338 21. McLean ARD, Wai HP, Thu AM, Khant ZS, Indrasuta C, Ashley EA, et al. Malaria elimination  
339 in remote communities requires integration of malaria control activities into general  
340 health care: An observational study and interrupted time series analysis in Myanmar.  
341 *Malar J*. 2020;19(1):1-14. <https://doi.org/10.1186/s12916-018-1172-x>

## 342 **Declarations**

343 Ethics approval and consent to participate.

344 The implementation and management of a Community Health Worker (CHW) network in the  
345 Greater Santo Domingo foci were led by the Ministry of Health's Centro de Prevención y Control  
346 de Enfermedades Transmitidas por Vectores y Zoonosis (CECOVEZ). CHW network data is securely  
347 stored on a SurveyCTO cloud server, version 2.8.1.1, which is compliant with GDPR. Data access  
348 is restricted to the Ministry of Health and select staff from the Clinton Health Access Initiative,  
349 who supported this project.

## 350 **Authors' contributions**

351 Nicole Michelén Ströfer: Conceptualization, data curation, investigation, methodology,  
352 visualization, Writing – original draft, Writing – review & editing

- 353 Natalia Tejada: Data curation, investigation, methodology, visualization, Writing – original draft,  
354 Writing – review & editing
- 355 Maria Yinet Santos Felix: Investigation, Writing – review & editing
- 356 Jose Luis Cruz Raposo: Writing – review & editing
- 357 Justin T. Lana: Formal analysis, Visualization, Writing – original draft, Writing – review & editing
- 358 Valérian Turbé: Visualization, Writing – original draft, Writing – review & editing
- 359 Justin Cohen: Writing – review & editing
- 360 Harriet Napier: Writing – original draft, Writing – review & editing
